# Supplementary material for: Combined Effect of Secondhand Smoking and Alcohol Drinking on Risk of Persistent Human Papillomavirus Infection
Source: Hindawi journal article supplement (doi:10.1155/2019/5829676), 2019-03-21
Supplement: f1 [file 5829676.f1.zip]

Supplementary table 1. General characteristics of study subjects

| Characteristics        | HR-HPV infection at enrollment |                       | p value <sup>c</sup> | 1-year HR-HPV persistence <sup>b</sup> |                          | p value <sup>c</sup> | 2-year HR-HPV persistence <sup>b</sup> |                         | p value <sup>c</sup> |
|------------------------|--------------------------------|-----------------------|----------------------|----------------------------------------|--------------------------|----------------------|----------------------------------------|-------------------------|----------------------|
|                        | Negative<br>(N = 8,866)        | Positive<br>(N = 980) |                      | Negative<br>(N = 1,092)                | Persistence<br>(N = 145) |                      | Negative<br>(N = 432)                  | Persistence<br>(N = 49) |                      |
| Age                    |                                |                       |                      |                                        |                          |                      |                                        |                         |                      |
| Mean (SE)              | 48.2 (0.10)                    | 46.9 (0.29)           | <0.01                | 48.4 (0.25)                            | 46.8 (0.73)              | 0.04                 | 48.0 (0.38)                            | 48.1 (1.05)             | 0.91                 |
| Body mass index        |                                |                       |                      |                                        |                          |                      |                                        |                         |                      |
| Mean (SE)              | 23.0 (0.03)                    | 22.7 (0.10)           | 0.02                 | 22.8 (0.09)                            | 22.4 (0.23)              | 0.10                 | 22.6 (0.14)                            | 21.7 (0.31)             | 0.04                 |
| Marriage               |                                |                       |                      |                                        |                          |                      |                                        |                         |                      |
| Single                 | 239 (86.6)                     | 37 (13.4)             | 0.06                 | 15 (71.4)                              | 6 (28.6)                 | 0.02                 | 5 (88.3)                               | 1 (16.7)                | 0.56                 |
| Married                | 8145 (90.1)                    | 894 (9.9)             |                      | 1011 (88.5)                            | 131 (11.5)               |                      | 399 (90.1)                             | 44 (9.9)                |                      |
| Menopausal             |                                |                       |                      |                                        |                          |                      |                                        |                         |                      |
| No                     | 2316 (88.6)                    | 298 (11.4)            | <0.01                | 235 (82.8)                             | 49 (17.2)                | 0.02                 | 89 (87.3)                              | 13 (12.7)               | 0.56                 |
| Yes                    | 3558 (91.2)                    | 341 (8.8)             |                      | 419 (88.6)                             | 54 (11.4)                |                      | 146 (89.6)                             | 17 (10.4)               |                      |
| No. of children        |                                |                       |                      |                                        |                          |                      |                                        |                         |                      |
| None or one            | 936 (90.6)                     | 97 (9.4)              | 0.86                 | 116 (90.6)                             | 12 (9.4)                 | 0.61                 | 45 (91.8)                              | 4 (8.2)                 | 0.72                 |
| Two                    | 4229 (90.4)                    | 448 (9.6)             |                      | 523 (87.6)                             | 74 (12.4)                |                      | 204 (88.7)                             | 26 (11.3)               |                      |
| Three or more          | 2170 (90.1)                    | 239 (9.9)             |                      | 234 (88.6)                             | 30 (11.4)                |                      | 90 (90.9)                              | 9 (9.1)                 |                      |
| Education level        |                                |                       |                      |                                        |                          |                      |                                        |                         |                      |
| ≤Middle school         | 1667 (91.3)                    | 158 (8.7)             | 0.04                 | 155 (86.6)                             | 24 (13.4)                | 0.29                 | 54 (93.1)                              | 4 (6.9)                 | 0.38                 |
| High school            | 3450 (90.2)                    | 374 (9.8)             |                      | 432 (87.1)                             | 64 (12.9)                |                      | 174 (87.9)                             | 24 (12.1)               |                      |
| ≥University            | 3137 (89.2)                    | 380 (10.8)            |                      | 422 (90.0)                             | 47 (10.0)                |                      | 177 (91.2)                             | 17 (8.8)                |                      |
| Active smoke           |                                |                       |                      |                                        |                          |                      |                                        |                         |                      |
| Non-smoker             | 8145 (90.3)                    | 876 (9.7)             | <0.01                | 1002 (88.5)                            | 130 (11.5)               | 0.39                 | 388 (89.4)                             | 46 (10.6)               | 0.36                 |
| Smoker (Current/Past)  | 721 (87.4)                     | 104 (12.6)            |                      | 90 (85.7)                              | 15 (14.3)                |                      | 44 (93.6)                              | 3 (6.4)                 |                      |
| Secondhand smoke       |                                |                       |                      |                                        |                          |                      |                                        |                         |                      |
| Non-smoker             | 5628 (90.4)                    | 601 (9.6)             | 0.19                 | 672 (88.4)                             | 88 (11.6)                | 0.84                 | 251 (89.6)                             | 29 (10.4)               | 0.88                 |
| Smoker (Current/Past)  | 3238 (89.5)                    | 379 (10.5)            |                      | 420 (88.1)                             | 57 (11.9)                |                      | 181 (90.1)                             | 20 (9.9)                |                      |
| Alcohol consumption    |                                |                       |                      |                                        |                          |                      |                                        |                         |                      |
| Non-drinker            | 4242 (91.2)                    | 410 (8.8)             | <0.01                | 580 (90.8)                             | 59 (9.2)                 | < 0.01               | 231 (91.7)                             | 21 (8.3)                | 0.07                 |
| Drinker (Current/Past) | 4059 (88.7)                    | 519 (11.3)            |                      | 447 (84.8)                             | 80 (15.2)                |                      | 177 (86.3)                             | 28 (13.7)               |                      |
| Oral contraceptive use |                                |                       |                      |                                        |                          |                      |                                        |                         |                      |
| Never                  | 5231 (89.9)                    | 589 (10.1)            | 0.13                 | 573 (86.4)                             | 90 (13.6)                | 0.23                 | 213 (87.7)                             | 30 (12.3)               | 0.28                 |
| User (Current/Past)    | 1357 (91.2)                    | 131 (8.8)             |                      | 174 (89.7)                             | 20 (10.3)                |                      | 61 (92.4)                              | 5 (7.6)                 |                      |
| Cytological results    |                                |                       |                      |                                        |                          |                      |                                        |                         |                      |
| Normal                 | 8189 (91.1)                    | 800 (8.9)             | <0.01                | 1055 (90.2)                            | 115 (9.8)                | < 0.01               | 423 (92.8)                             | 33 (7.2)                | <0.01                |
| ASCUS                  | 113 (60.8)                     | 73 (39.2)             |                      | 24 (60.0)                              | 16 (40.0)                |                      | 9 (50.0)                               | 9 (50.0)                |                      |
| LSIL                   | 12 (20.7)                      | 46 (79.3)             |                      | 3 (21.4)                               | 11 (78.6)                |                      | 0 (0.0)                                | 6 (100)                 |                      |
| HSIL or worse          | 2 (6.9)                        | 27 (93.1)             |                      | 0 (0.0)                                | 0 (0.0)                  |                      | 0 (0.0)                                | 0 (0.0)                 |                      |

Numbers are based on available data, as not all 9,846 women completely filled-in the questionnaire, having excluded some variables related to smoking

status.

<sup>a</sup> Enrolment HR-HPV infection indicates the HR-HPV infection at the time of enrolment. 'Negative' or 'Positive' indicates the result of detection for 13 DNA types of high risk-human papillomavirus (HR-HPV) (16, 18, 31, 33, 35, 39, 45, 51, 52, 56, 58, 59, and 68) using hybrid capture II.

<sup>b</sup> 1-year and 2-year HR-HPV persistence were defined as HPV positivity in the 1-year follow-up study year and as HPV positivity in both the 1- and 2-year follow-up study years, respectively, after enrolment with HR-HPV positivity. One- and 2-year HPV negatives were defined as HPV negativity in the 1-year follow-up study year and as HPV negativity in both the 1-and 2-year follow-up study years, respectively, after enrolment with HPV negativity.

<sup>c</sup> The Chi-square test and t-test were used to assess the significance of differences in the distribution of categorical variables and continuous variables between the two groups, respectively.
