# Supplementary material for: Combined Effect of Secondhand Smoking and Alcohol Drinking on Risk of Persistent Human Papillomavirus Infection
Source: Hindawi journal article supplement (doi:10.1155/2019/5829676), 2019-03-21
Supplement: f1 [file 5829676.f1.zip]

# Demographic Questionnaire

|              |                        |                  |               |
|--------------|------------------------|------------------|---------------|
| ID           |                        | Visit date       |               |
| Name         |                        | Date of birth    |               |
| Gender       | Male · Female          | Age              |               |
| Phone number |                        | Telephone number | (     )     - |
| Height       | _____cm                | Weight           | _____kg       |
| Address      | (zip code:     -     ) |                  |               |

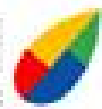

**1. What is your current marital status?**

- ① Never married ☐    ② Married or living as married ☐    ③ Divorced ☐  
④ Separated ☐    ⑤ Widowed ☐

**2. What is your religion?**

- ① Protestant ☐    ② Catholic ☐    ③ Buddhism ☐    ④ Hinduism ☐    ⑤ Islam ☐  
⑥ Other ☐    ⑦ No religion ☐

**3. Which of these categories best describe your current working situation ? If you are currently retired, please select about your previous retirement.**

- ① Civil servant, soldier ☐    ② Businessmen, management ☐  
③ Office and technical staff ☐    ④ Sales and service ☐  
⑤ Production, labor ☐    ⑥ Profession (professor, doctor, etc.) ☐  
⑦ Self-employed ☐    ⑧ Student ☐  
⑨ Housewives (housework) ☐    ⑩ Unemployed ☐  
⑪ Not applicable (under 14 years old) ☐    ⑫ Do not know ☐

**4. What is your current job status?**

- ① Regular wage worker ☐    ② Non-regular workers wage worker ☐  
③ Employer with employee ☐    ④ Self-employed without employees ☐  
⑤ Unpaid family worker ☐    ⑥ Not applicable ☐    ⑦ Do not know ☐

**5. What is the highest grade or level of schooling you completed?**

- ① Preschool children ☐    ② No school (unable to read Korean) ☐  
③ No school (can read Korean) ☐    ④ less than 6 years ☐  
⑤ 7 through 9 years ☐    ⑥ 10 through 12 years ☐  
⑦ College graduate ☐    ⑧ Postgraduate ☐    ⑨ Do not know ☐

**6. What is the average monthly household income (total income of all living together, including yourself)?**

- ① Less than 1 million won ☐    ② Less than 2 million won ☐    ③ Less than 3 million won ☐  
④ Less than 4 million won ☐    ⑤ Less than 5 million won ☐    ⑥ Less than 6 million won ☐  
⑦ Less than 7 million won ☐    ⑧ Less than 8 million won ☐    ⑨ More than 8 million won ☐  
⑩ Do not know ☐

※ Please answer the following questions only for women. (man is to be moved to question 14)

7. How old were you when you had your first menstrual period?

- ① \_\_\_\_\_ years      ② Do not know ☐      ③ No menstruation yet ☐  
(reason: \_\_\_\_\_)

8. Has your menstruation been completely suspended at this time?

- ① No ☐      1) Is the menstrual cycle regular?  
    ① regular ( every \_\_\_\_\_ days )      ② Irregular  
2) Is the menstruation term normal?  
    ① regular ( every \_\_\_\_\_ days )      ② Irregular  
3) When was the last menstrual start date? \_\_\_\_ month \_\_\_\_ date  
② Yes ☐      1) At what age did your the menstruation completely stopped?  
    \_\_\_\_\_ year  
2) Why was the menstruation stopped?  
    ① Natural menopause ☐      ② Surgery ☐  
    ③ Radiation ☐      ④ Drug therapy ☐  
    ⑤ Do not know ☐  
3) Have you ever taken or been injected with a female hormone since menopause ?  
    ① Yes ☐      ② No ☐

9. Have you ever given birth?

- ① No ☐  
② Yes ☐      1) When was the first child born? \_\_\_\_\_ year  
    2) How many children you have given birth \_\_\_\_\_ person

10. Have you ever breastfeed your baby?

- ① No ☐  
② Yes ☐      1) \_\_\_\_\_ person

11. Have your ever had a miscarriage?

- ① No ☐  
② Natural heritage ☐ ( \_\_\_\_\_ times )  
③ Artificial abortion ☐ ( \_\_\_\_\_ times )

12. Have you ever taken a contraceptive pill?

- ① No, never taken ☐
- ② Yes, still taking ☐ for \_\_\_ year and \_\_\_ months from the age of \_\_\_
- ③ Yes, taken in the past ☐ for \_\_\_ year and \_\_\_ months from the age of \_\_\_

13. Have you ever had hormone injections or medication since your menstruation has completely stopped (including both artificial and natural interruptions) ?

- ① No, never treated ☐
- ② Yes, still being treated ☐ for \_\_\_ year and \_\_\_ months from the age of \_\_\_
- ③ Yes, treated in the past ☐ for \_\_\_ year and \_\_\_ months from the age of \_\_\_

※ The following questions will be asked about your medical history and drug use.

14. Have you ever been diagnosed with the following disease from your doctor or clinic? Please refer to the next pages.

- ① No ☐
- ② Yes ☐  Please mark the item below.

| Disease name                                                  | Age at the first diagnosis | Treatment status                                                                                                         |
|---------------------------------------------------------------|----------------------------|--------------------------------------------------------------------------------------------------------------------------|
| <input type="checkbox"/> Hypertension                         | ( )year                    | <input type="checkbox"/> Complete recovery <input type="checkbox"/> Under treatment <input type="checkbox"/> Not treated |
| <input type="checkbox"/> Diabetes                             | ( )year                    | <input type="checkbox"/> Complete recovery <input type="checkbox"/> Under treatment <input type="checkbox"/> Not treated |
| <input type="checkbox"/> Thyroid disease                      | ( )year                    | <input type="checkbox"/> Complete recovery <input type="checkbox"/> Under treatment <input type="checkbox"/> Not treated |
| <input type="checkbox"/> Endometritis                         | ( )year                    | <input type="checkbox"/> Complete recovery <input type="checkbox"/> Under treatment <input type="checkbox"/> Not treated |
| <input type="checkbox"/> Breast positive disease              | ( )year                    | <input type="checkbox"/> Complete recovery <input type="checkbox"/> Under treatment <input type="checkbox"/> Not treated |
| <input type="checkbox"/> Malignant tumor (cancer)<br>Type:( ) | ( )year                    | <input type="checkbox"/> Complete recovery <input type="checkbox"/> Under treatment <input type="checkbox"/> Not treated |
| <input type="checkbox"/> Malignant tumor (cancer)<br>Type:( ) | ( )year                    | <input type="checkbox"/> Complete recovery <input type="checkbox"/> Under treatment <input type="checkbox"/> Not treated |
| <input type="checkbox"/> Other chronic disease:<br>_____      | ( )year                    | <input type="checkbox"/> Complete recovery <input type="checkbox"/> Under treatment <input type="checkbox"/> Not treated |

| Cancer type                   |                |                              |                |                            |            |
|-------------------------------|----------------|------------------------------|----------------|----------------------------|------------|
| 1. Lip and oral               | 2. Esophageal  | 3. Gastric                   | 4. Small bowel | 5. Colorectal              |            |
| 6. Liver                      | 7. Gallbladder | 8. Biliary                   | 9. Pancreatic  | 10. Laryngeal              | 11. Lung   |
| 12. Bone, articular cartilage | 13. Skin       | 14. Mesothelial tumor tissue |                |                            |            |
| 15. Breast                    | 16. Cervical   | 17. Endometrial              | 18. Ovarian    | 19. Prostate               | 20. Kidney |
| 21. Renal pelvic              | 22. Ureteral   | 23. Bladder                  | 24. Brain      | 25. Non-Hodgkin's lymphoma |            |
| 26. Multiple myeloma          | 27. Leukemia   | 28. Thyroid                  | 29. Testicular | 30. Other                  |            |

15. Have your immediate family member (parents, siblings, children) or relatives (blood relatives) been diagnosed with the following disease from a doctor or clinic ?

① No ☐

② Yes ☐  Please mark the item below.

| Disease name                                             | If yes, please indicate all cases                                                                                                                                                                                                                                                                                                                                                                             |
|----------------------------------------------------------|---------------------------------------------------------------------------------------------------------------------------------------------------------------------------------------------------------------------------------------------------------------------------------------------------------------------------------------------------------------------------------------------------------------|
| <input type="checkbox"/> Hypertension                    | <input type="checkbox"/> Grandfather (father' s side) <input type="checkbox"/> Grandmother (father' s side)<br><input type="checkbox"/> Grandfather (mother' s side) <input type="checkbox"/> Grandmother (mother' s side)<br><input type="checkbox"/> Father <input type="checkbox"/> Mother <input type="checkbox"/> Brothers <input type="checkbox"/> Relative:____ <input type="checkbox"/> Relative:____ |
| <input type="checkbox"/> Diabetes                        | <input type="checkbox"/> Grandfather (father' s side) <input type="checkbox"/> Grandmother (father' s side)<br><input type="checkbox"/> Grandfather (mother' s side) <input type="checkbox"/> Grandmother (mother' s side)<br><input type="checkbox"/> Father <input type="checkbox"/> Mother <input type="checkbox"/> Brothers <input type="checkbox"/> Relative:____ <input type="checkbox"/> Relative:____ |
| <input type="checkbox"/> Stroke                          | <input type="checkbox"/> Grandfather (father' s side) <input type="checkbox"/> Grandmother (father' s side)<br><input type="checkbox"/> Grandfather (mother' s side) <input type="checkbox"/> Grandmother (mother' s side)<br><input type="checkbox"/> Father <input type="checkbox"/> Mother <input type="checkbox"/> Brothers <input type="checkbox"/> Relative:____ <input type="checkbox"/> Relative:____ |
| <input type="checkbox"/> Heart disease                   | <input type="checkbox"/> Grandfather (father' s side) <input type="checkbox"/> Grandmother (father' s side)<br><input type="checkbox"/> Grandfather (mother' s side) <input type="checkbox"/> Grandmother (mother' s side)<br><input type="checkbox"/> Father <input type="checkbox"/> Mother <input type="checkbox"/> Brothers <input type="checkbox"/> Relative:____ <input type="checkbox"/> Relative:____ |
| <input type="checkbox"/> Cervical cancer                 | <input type="checkbox"/> Grandfather (father' s side) <input type="checkbox"/> Grandmother (father' s side)<br><input type="checkbox"/> Grandfather (mother' s side) <input type="checkbox"/> Grandmother (mother' s side)<br><input type="checkbox"/> Father <input type="checkbox"/> Mother <input type="checkbox"/> Brothers <input type="checkbox"/> Relative:____ <input type="checkbox"/> Relative:____ |
| <input type="checkbox"/> Thyroid cancer                  | <input type="checkbox"/> Grandfather (father' s side) <input type="checkbox"/> Grandmother (father' s side)<br><input type="checkbox"/> Grandfather (mother' s side) <input type="checkbox"/> Grandmother (mother' s side)<br><input type="checkbox"/> Father <input type="checkbox"/> Mother <input type="checkbox"/> Brothers <input type="checkbox"/> Relative:____ <input type="checkbox"/> Relative:____ |
| <input type="checkbox"/> Breast cancer                   | <input type="checkbox"/> Grandfather (father' s side) <input type="checkbox"/> Grandmother (father' s side)<br><input type="checkbox"/> Grandfather (mother' s side) <input type="checkbox"/> Grandmother (mother' s side)<br><input type="checkbox"/> Father <input type="checkbox"/> Mother <input type="checkbox"/> Brothers <input type="checkbox"/> Relative:____ <input type="checkbox"/> Relative:____ |
| <input type="checkbox"/> Other cancer :<br>_____         | <input type="checkbox"/> Grandfather (father' s side) <input type="checkbox"/> Grandmother (father' s side)<br><input type="checkbox"/> Grandfather (mother' s side) <input type="checkbox"/> Grandmother (mother' s side)<br><input type="checkbox"/> Father <input type="checkbox"/> Mother <input type="checkbox"/> Brothers <input type="checkbox"/> Relative:____ <input type="checkbox"/> Relative:____ |
| <input type="checkbox"/> Other chronic disease:<br>_____ | <input type="checkbox"/> Grandfather (father' s side) <input type="checkbox"/> Grandmother (father' s side)<br><input type="checkbox"/> Grandfather (mother' s side) <input type="checkbox"/> Grandmother (mother' s side)<br><input type="checkbox"/> Father <input type="checkbox"/> Mother <input type="checkbox"/> Brothers <input type="checkbox"/> Relative:____ <input type="checkbox"/> Relative:____ |

16. Do you have medicines that have been taken twice or more per week over the last two years?

① There is no medicine to eat constantly ☐

② Yes ☐  Please mark below.

| Drug name                                           | Number of times            | Single dose | Total duration |
|-----------------------------------------------------|----------------------------|-------------|----------------|
| <input type="checkbox"/> Acetaminophen              | weekly or daily ____ times | ____pills   | ____month      |
| <input type="checkbox"/> Aspirin                    | weekly or daily ____ times | ____pills   | ____month      |
| <input type="checkbox"/> Blood pressure medicine    | weekly or daily ____ times | ____pills   | ____month      |
| <input type="checkbox"/> Diabetes drug              | weekly or daily ____ times | ____pills   | ____month      |
| <input type="checkbox"/> Allergy drug               | weekly or daily ____ times | ____pills   | ____month      |
| <input type="checkbox"/> Heartburn medication       | weekly or daily ____ times | ____pills   | ____month      |
| <input type="checkbox"/> Other drugs<br>name: _____ | weekly or daily ____ times | ____pills   | ____month      |
| <input type="checkbox"/> Other drugs<br>name: _____ | weekly or daily ____ times | ____pills   | ____month      |

※ The following section is for smoking and drinking habits.

17. Have you ever smoked cigarettes ?

① No ☐

② Yes, still smoking ☐

1) How old were you when you first smoked? \_\_\_\_\_year

2) How many years have you smoked so far? \_\_\_\_\_year

3) How many cigarettes have you smoked per day on average in the past year?  
\_\_\_\_\_cigarettes

③ Yes, but do not smoke now. ☐

1) If you quit smoking, how long is it?

☐Less than 1 year    ☐1-3 years    ☐4-6 years    ☐7-10 years

☐11-15 years    ☐More than 16 years    ☐ Do not know

2) Before you quit smoking, how many cigarettes did you smoke on average a day in year? \_\_\_\_\_cigarettes

**18. Have you ever been exposed to smoking indirectly?**

① No ☐

② Yes ☐

1) How much are you exposed to smoking at home?

☐ None

☐ Less than 3 days per week

☐ More than 3 days per week

☐ Daily

2) How long are you exposed to average daily smoking in your home ?

\_\_\_\_\_hours \_\_\_\_\_minutes

3) How long are you exposed to smoking at work?

☐ None

☐ Less than 3 days per week

☐ More than 3 days per week

☐ Daily

4) How long are you exposed to average daily smoking in your work?

\_\_\_\_\_hours \_\_\_\_\_minutes

**19. Have you ever had any drinking experience?**

① No ☐

② Yes ☐

1) How many years have you been drinking so far? \_\_\_\_\_years

2) Please indicate the average number of drinks during the past year.

☐ less than once a month

☐ 1-3 times a month

☐ 1-2 times a week

☐ 3-4 times a week

☐ 5-6 times a week

☐ daily

③ No, but do not drink now ☐

1) How long have you stopped drinking ? \_\_\_\_\_years

2) Please indicate the average number of times you drunk during a year before you stop drinking.

☐ less than once a month

☐ 1-3 times a month

☐ 1-2 times a week

☐ 3-4 times a week

☐ 5-6 times a week

☐ daily

※ The following survey is to evaluate your regular exercise habits during the past 7 days.

20. How many days did you do intense physical activity during the last 7 days?

- ① \_\_\_\_\_ days / week
- ② No intense physical activity ➡ *Go to question22*

21. How often did you usually do intense physical activity during the day?

- ① \_\_\_\_\_ hours \_\_\_\_\_ minutes
- ② Do not know

22. How many days did you perform moderate physical activity during the last 7 days?

- ① \_\_\_\_\_ days / week
- ② No moderate physical activity ➡ *Go to question24*

23. How often did you have a moderate amount of physical activity during the day?

- ① \_\_\_\_\_ hours \_\_\_\_\_ minutes
- ② Do not know

24. How many days did you walk for a least 10 minutes at a time during the last 7 days?

- ① \_\_\_\_\_ days / week
- ② Never walked ➡ *Go to question26*

25. How often did you walk during the day?

- ① \_\_\_\_\_ hours \_\_\_\_\_ minutes
- ② Do not know

26. How much time have you spent sitting on weekdays during the last 7 days?

- ① \_\_\_\_\_ hours \_\_\_\_\_ minutes
- ② Do not know
